# Supplementary material for: Optimization of oligonucleotide arrays and RNA amplification protocols for analysis of transcript structure and alternative splicing
Source: Springer Nature journal article supplement (doi:10.1186/gb-2003-4-10-r66), 2003-09-19
Supplement: Additional file 4 [file gb-2003-4-10-r66-s4.pdf]

**Protocol Supplement to Castle *et al*, Genome Biology 2003, 4:R66**

| <b>Reaction</b>                                 | <b>Amount</b>                  |
|-------------------------------------------------|--------------------------------|
| <b>Perform RP-RT#1</b>                          |                                |
| Thaw 1.33 $\mu$ m shDNP256 primer plate on ice  |                                |
| <b>Resuspend_shDNP256</b>                       | 15 $\mu$ L                     |
| Incubate at room temperature                    | 15 minutes                     |
| RunPCR <b>rp-rt-a</b>                           | 10min70c>5min4c>10min22c       |
| Complete RT #1 Cocktail, add, and mix           | <b>1.5X</b>                    |
| RT#1 Premix                                     | <b>30 <math>\mu</math>L</b>    |
| 0.1 M DTT                                       | <b>6 <math>\mu</math>L</b>     |
| Superscript II                                  | <b>1.5 <math>\mu</math>L</b>   |
| <b>Add_RT1_Cocktail</b>                         | 25 $\mu$ L                     |
| Quick Spin                                      | 20 sec. x 500 rcf              |
| Run PCR <b>rp-rt-60min</b>                      | 60min42c>4c hold               |
| <b>Hydrolyze RNA</b>                            |                                |
| <b>RPamp_RT1_Add_NaOH_EDTA</b>                  | 20 $\mu$ L                     |
| Run PCR <b>rp-rt-c</b>                          | 20min65c>4c hold               |
| <b>RPamp_RT1_Add_Trис</b>                       | 20 $\mu$ L                     |
| <b>Add_H2O_RT1</b>                              | 20 $\mu$ L                     |
| <b>Purify the cDNA</b>                          | <b>Qiaquick</b>                |
| <b>Dry</b>                                      |                                |
| Dry down remaining volume in Speed-Vac          | 2 hours x 50C                  |
|                                                 |                                |
| <b>Rehydrate &amp; Perform 2ss</b>              |                                |
| Thaw 1.35 $\mu$ m shT7N9 primer plate on ice    |                                |
| <b>Resuspend_shT7N9 primer</b>                  | 20 $\mu$ L                     |
| Incubate at Room Temperature                    | 15 minutes                     |
| RunPCR <b>second-str-1</b>                      | 5min70c>10min22c>4c hold       |
| Complete 2ss Cocktail, add, and mix             | <b>1.5X</b>                    |
| Premix                                          | <b>43.5 <math>\mu</math>L</b>  |
| 5 U/ $\mu$ L Klenow (Large Fragment Polymerase) | <b>1.5 <math>\mu</math>L</b>   |
| <b>Add_SS_Cocktail</b>                          | 30 $\mu$ L                     |
| Run PCR <b>second-str-2</b>                     | 1hr37c>2min65c>4c hold         |
| <b>Purify the DNA</b>                           | <b>Qiaquick</b>                |
| <b>Dry</b>                                      |                                |
| Dry down remaining volume in Speed-Vac          | 2 hours x 50C                  |
| <b>Rehydrate &amp; Perform PCR</b>              |                                |
| <b>Resuspend_PCR</b>                            | 25 $\mu$ L water               |
| Incubate at Room Temperature                    | 15 minutes                     |
| <b>Perform PCR Reaction</b>                     |                                |
| Thaw PCR Cocktail on ice                        |                                |
| Complete PCR cocktail, add, and mix             | <b>1.5X</b>                    |
| Premix                                          | <b>106.5 <math>\mu</math>L</b> |
| T7 Primer (100uM)                               | <b>1.5 <math>\mu</math>L</b>   |
| DP256 Primer (100uM)                            | <b>1.5 <math>\mu</math>L</b>   |
| Taq Polymerase                                  | <b>3 <math>\mu</math>L</b>     |
| <b>Add_PCR_Cocktail</b>                         | 75 $\mu$ L                     |
| Run PCR program                                 |                                |
| <b>Purify the dsDNA</b>                         | <b>Qiaquick</b>                |
| <b>Dry</b>                                      |                                |
| Dry down remaining volume in Speed-Vac          | 2 hours x 50C                  |
| <b>Rehydrate &amp; Perform IVT</b>              |                                |
| <b>Resuspend_IVT</b>                            | 40 $\mu$ L water               |
| Incubate at Room Temperature                    | 15 minutes                     |
| Complete IVT cocktail, add, and mix             | <b>1.5X</b>                    |
| Premix                                          | <b>48.15 <math>\mu</math>L</b> |
| 100 mM DTT                                      | <b>9 <math>\mu</math>L</b>     |
| RNAGuard                                        | <b>0.75 <math>\mu</math>L</b>  |
| T7 Polymerase                                   | <b>1.2 <math>\mu</math>L</b>   |
| iPPase                                          | <b>0.9 <math>\mu</math>L</b>   |
| <b>Add_IVT_Cocktail</b>                         | 40 $\mu$ L                     |

|                                          |                          |
|------------------------------------------|--------------------------|
| Run PCR <b>DTAP-IVT</b>                  | 16hrs42c>4c hold         |
| <b>Purify the cRNA</b>                   | <b>RNeasy</b>            |
| <b>Quantify cRNA</b>                     |                          |
| <b>Generate RP-RT#2 Plates</b>           |                          |
| Split cRNA                               | 3ug/well                 |
| <b>Dry</b>                               |                          |
| Dry down remaining volume in Speed-Vac   | 20 Minutes x 50C         |
| <b>Resuspend and anneal to Primer</b>    |                          |
| Thaw N9 Primer Source Plate              |                          |
| <b>RP-Amp_Resuspend_N9</b>               | 15 µL                    |
| Incubate at room temperature             | 15 minutes               |
| RunPCR <b>rp-rt-a</b>                    | 10min70c>5min4c>10min22c |
| <b>RT Reaction</b>                       |                          |
| Complete RT Cocktail and add mix:        | <b>1.5X</b>              |
| Premix                                   | <b>41.25 µL</b>          |
| 100 mM DTT                               | <b>7.5 µL</b>            |
| 200 U/µL SSII                            | <b>3.75 µL</b>           |
| Distribute 96-well plate                 | 80 µL                    |
| <b>RP-Amp_Add_RT2Cocktail</b>            | 35 µL                    |
| Run PCR <b>rp-rt-60min</b>               | 60min42c>4c hold         |
| <b>Hydrolysis and Neutralization</b>     |                          |
| <b>RP-Amp_RT2_Add_NaOH_EDTA</b>          | 25 µL                    |
| Run PCR <b>rp-rt-c</b>                   | 20min65c>4c hold         |
| <b>RP-Amp_RT2_Add_Trис</b>               | 25 µL                    |
| <b>RP-Amp_Add_NaOAc</b>                  | 7 µL                     |
| <b>Purify the ssDNA</b>                  | <b>Qiaquick</b>          |
| <b>Quantify</b>                          |                          |
| <b>Pool/Concentrate Samples</b>          |                          |
| <b>Quantify concentrated aa-ccDNA</b>    |                          |
| <b>Create Coupling Ready Plates</b>      |                          |
| Split samples into coupling ready plates | 5 µg                     |
| Dry down volume in Speed-Vac             | 30 minutes x 50C         |

**Premixes** contain buffers and nucleotides

**Cocktails** are premixes with enzymes and DTT

Premixes made be made ahead of time and frozen at -20C. Make the cocktail by thawing and adding the enzymes and DTT just before use.

**RT1 Final Reaction Concentrations**

10 mM DTT, 50 mM Tris-HCl pH 8.3, 75 mM KCl, 8 mM MgCl<sub>2</sub>, 0.5 mM dNTPs, 5 U/μl Superscript II

**Second Strand Final Reaction Concentrations**

0.2 mM DTT, 2.1 mM Tris-HCl pH 7.9, 2.1 mM MgCl<sub>2</sub>, 10.7 mM NaCl, 1.07 mM dNTPs, 0.1U/μl Klenow

**PCR Final Reaction Concentrations**

20 mM Tris-HCl pH 8.4, 50 mM KCl, 0.01 mM dNTPs, 1.5 mM MgCl<sub>2</sub>, 0.01 U/μl Taq Polymerase

**IVT Final Reaction Concentrations**

7.5 mM DTT, 40 mM Tris-HCl pH 7.5, 14.25 mM MgCl<sub>2</sub>, 10 mM NaCl, 2 mM Spermidine, 125 U/ml RNAGuard, 2.5 mM dNTPs, 15 U/ml IPPase, 25kU/ml T7 Polymerase

**RT2 Final Reaction Concentrations**

10 mM DTT, 50mM Tris-HCl pH 8.3, 75 mM KCl, 8 mM MgCl<sub>2</sub>, 0.5 mM dNTPs, 0.5 mM aa-dUTP, 5 U/μl Superscript II

**PCR Conditions:**

1. 94C for 5 min
  2. 94C for 45 sec
  3. 40C for 2 min
  4. 72C for 4 min
- Repeat 2-4 one time
5. 94C for 45 sec
  6. 55C for 2 min
  7. 72C for 4 min
- Repeat 5-7 seven times
- 4C forever
